# Supplementary material
Source: PubMed Central journal article supplement (PMC7834976)
Supplement: mmc1.pdf [file mmc1.pdf]

# THE LANCET

## Gastroenterology & Hepatology

### Supplementary appendix

This appendix formed part of the original submission and has been peer reviewed. We post it as supplied by the authors.

Supplement to: Alexander JL, Moran GW, Gaya DR, et al. SARS-CoV-2 vaccination for patients with inflammatory bowel disease: a British Society of Gastroenterology Inflammatory Bowel Disease section and IBD Clinical Research Group position statement. *Lancet Gastroenterol Hepatol* 2021; published online Jan 25. [https://doi.org/10.1016/S2468-1253\(21\)00024-8](https://doi.org/10.1016/S2468-1253(21)00024-8).

## **Appendix**

### **Members of the IBD section of the BSG and Clinical Research Group contributing to this commentary**

Ramesh Arasaradnam, Ian Arnott, Anjan Dhar, Ailsa Hart, Tariq Iqbal, Nicholas A. Kennedy, James O. Lindsay, Christine Norton, Miles Parkes, Tim Raine, Shaji Sebastian, Sreedhar Subramanian, Christopher A. Lamb, Charlie Lees, Shahida Din, Philip J. Smith, Daniel R. Gaya, Gordon Moran, Jackie Glatter, Jochen Kammermeier, Liz Dobson, Jonathan Macdonald, Madhoo Ramdeen, Nabil Quraishi, Peter Sagar, Ruth Wakeman, Jonathan P. Segal, Christian Selinger, Shellie Radford, R. Alexander Speight, Helen Steed, Tariq Ahmad, Michael Mcfarlane, A Barney Hawthorne.

## SARS-CoV-2 vaccine development milestones

| Date       | Milestone                                                                                    |
|------------|----------------------------------------------------------------------------------------------|
| 01/12/2019 | COVID-19 illness documented                                                                  |
| 11/01/2020 | SARS-CoV-2 virus sequence shared                                                             |
| 13/01/2020 | NIH designs mRNA vaccine in collaboration with Moderna                                       |
| 03/02/2020 | SARS-CoV2 virus sequence published <sup>1</sup>                                              |
| 16/03/2020 | Moderna Phase I/II trial begins                                                              |
| 22/04/2020 | Pfizer/BioNTech Phase I/II trial begins                                                      |
| 14/07/2020 | Moderna Phase I/II trial published <sup>2</sup>                                              |
| 27/07/2020 | Moderna and Pfizer/BioNTech Phase III trials begin                                           |
| 12/08/2020 | Pfizer/BioNTech Phase I/II published <sup>3</sup>                                            |
| 22/10/2020 | Enrolment in Moderna and Pfizer/BioNTech Phase III trials complete >74,000 participants      |
| 09/11/2020 | Pfizer/BioNTech announced interim analysis efficacy >90%                                     |
| 16/11/2020 | Moderna announced interim analysis efficacy 94.5%                                            |
| 18/11/2020 | Pfizer/BioNTech announced 95% efficacy as final result                                       |
| 02/12/2020 | Permission for use granted in the UK for the BNT162b2 vaccine (Pfizer/BioNTech) <sup>4</sup> |
| 08/12/2020 | First person receives BNT162b2 vaccine (Pfizer/BioNTech) in UK                               |
| 08/12/2020 | ChAdOx1 nCov-19 vaccine (AstraZeneca) Phase III data published <sup>5</sup>                  |
| 10/12/2020 | BNT162b2 vaccine (Pfizer/BioNTech) Phase III data published <sup>6</sup>                     |
| 30/12/2020 | Permission for use granted in the UK for the ChAdOx1 nCov-19 vaccine <sup>7</sup>            |
| 30/12/2020 | mRNA-1273 vaccine (Moderna) Phase III data published <sup>8</sup>                            |
| 04/01/2021 | First person receives ChAdOx1 nCov-19 vaccine in UK                                          |
| 08/01/2021 | Permission for use granted in the UK for the mRNA-1273 vaccine <sup>9</sup>                  |

## References

1. Wu F, Zhao S, Yu B, et al. A new coronavirus associated with human respiratory disease in China. *Nature* 2020; **579**(7798): 265-9.
2. Jackson LA, Anderson EJ, Roupael NG, et al. An mRNA Vaccine against SARS-CoV-2 - Preliminary Report. *The New England journal of medicine* 2020; **383**(20): 1920-31.
3. Mulligan MJ, Lyke KE, Kitchin N, et al. Phase I/II study of COVID-19 RNA vaccine BNT162b1 in adults. *Nature* 2020; **586**(7830): 589-93.
4. Medicines & Healthcare products Regulatory Agency. Information for Healthcare Professionals on Pfizer/BioNTech COVID-19 vaccine. <https://www.gov.uk/government/publications/regulatory-approval-of-pfizer-biontech->

[vaccine-for-covid-19/information-for-healthcare-professionals-on-pfizerbiontech-covid-19-vaccine](#) (accessed 08/01/2021).

5. Voysey M, Clemens SAC, Madhi SA, et al. Safety and efficacy of the ChAdOx1 nCoV-19 vaccine (AZD1222) against SARS-CoV-2: an interim analysis of four randomised controlled trials in Brazil, South Africa, and the UK. *Lancet (London, England)* 2020.
6. Polack FP, Thomas SJ, Kitchin N, et al. Safety and Efficacy of the BNT162b2 mRNA Covid-19 Vaccine. *The New England journal of medicine* 2020.
7. Medicines & Healthcare products Regulatory Agency. Information for Healthcare Professionals on COVID-19 Vaccine AstraZeneca.  
<https://www.gov.uk/government/publications/regulatory-approval-of-covid-19-vaccine-astrazeneca/information-for-healthcare-professionals-on-covid-19-vaccine-astrazeneca> (accessed 08/01/2021).
8. Baden LR, El Sahly HM, Essink B, et al. Efficacy and Safety of the mRNA-1273 SARS-CoV-2 Vaccine. *The New England journal of medicine* 2020.
9. Medicines & Healthcare products Regulatory Agency. Information for Healthcare Professionals on COVID-19 Vaccine Moderna.  
<https://www.gov.uk/government/publications/regulatory-approval-of-covid-19-vaccine-moderna/information-for-healthcare-professionals-on-covid-19-vaccine-moderna> (accessed 08/01/2021).

## **SARS-CoV-2 vaccination in IBD patients: Top tips**

1. SARS-CoV2 vaccination is the best way to protect IBD patients against COVID-19.
2. The vast majority of IBD patients qualify for vaccination, including patients taking immunosuppressive drugs.
3. All three of the currently approved vaccines (Table 1), can be used in IBD patients, including immunosuppressed patients. This includes the ChAdOx1 nCoV-19 vaccine, which is an adenovirus vector engineered so that it cannot replicate in human recipients.
4. Vaccination is especially important in IBD patients taking immunosuppressive drugs, or who have other health problems, which increase your risk from COVID-19.
5. IBD treatment should not be stopped or delayed prior to vaccination as this may lead to an IBD disease flare (which itself has been linked to reduced vaccine responses with other vaccines).
6. SARS-CoV2 vaccination should still be offered to IBD patients who have previously been infected with the virus.
7. Even after vaccination, IBD patients are advised to continue to follow the same social distancing guidelines which applied to them prior to vaccination.
8. Whilst all effort has been made to ensure this document is up to date, IBD patients and clinicians are advised to keep abreast of any changes to regulatory guidance in this fast-moving field.
